# Supplementary material
Source: Springer Nature journal article supplement (https://www.springermedizin.de/resource/supplementary/12987_2012_47_MOESM2_ESM.pdf/9680730)

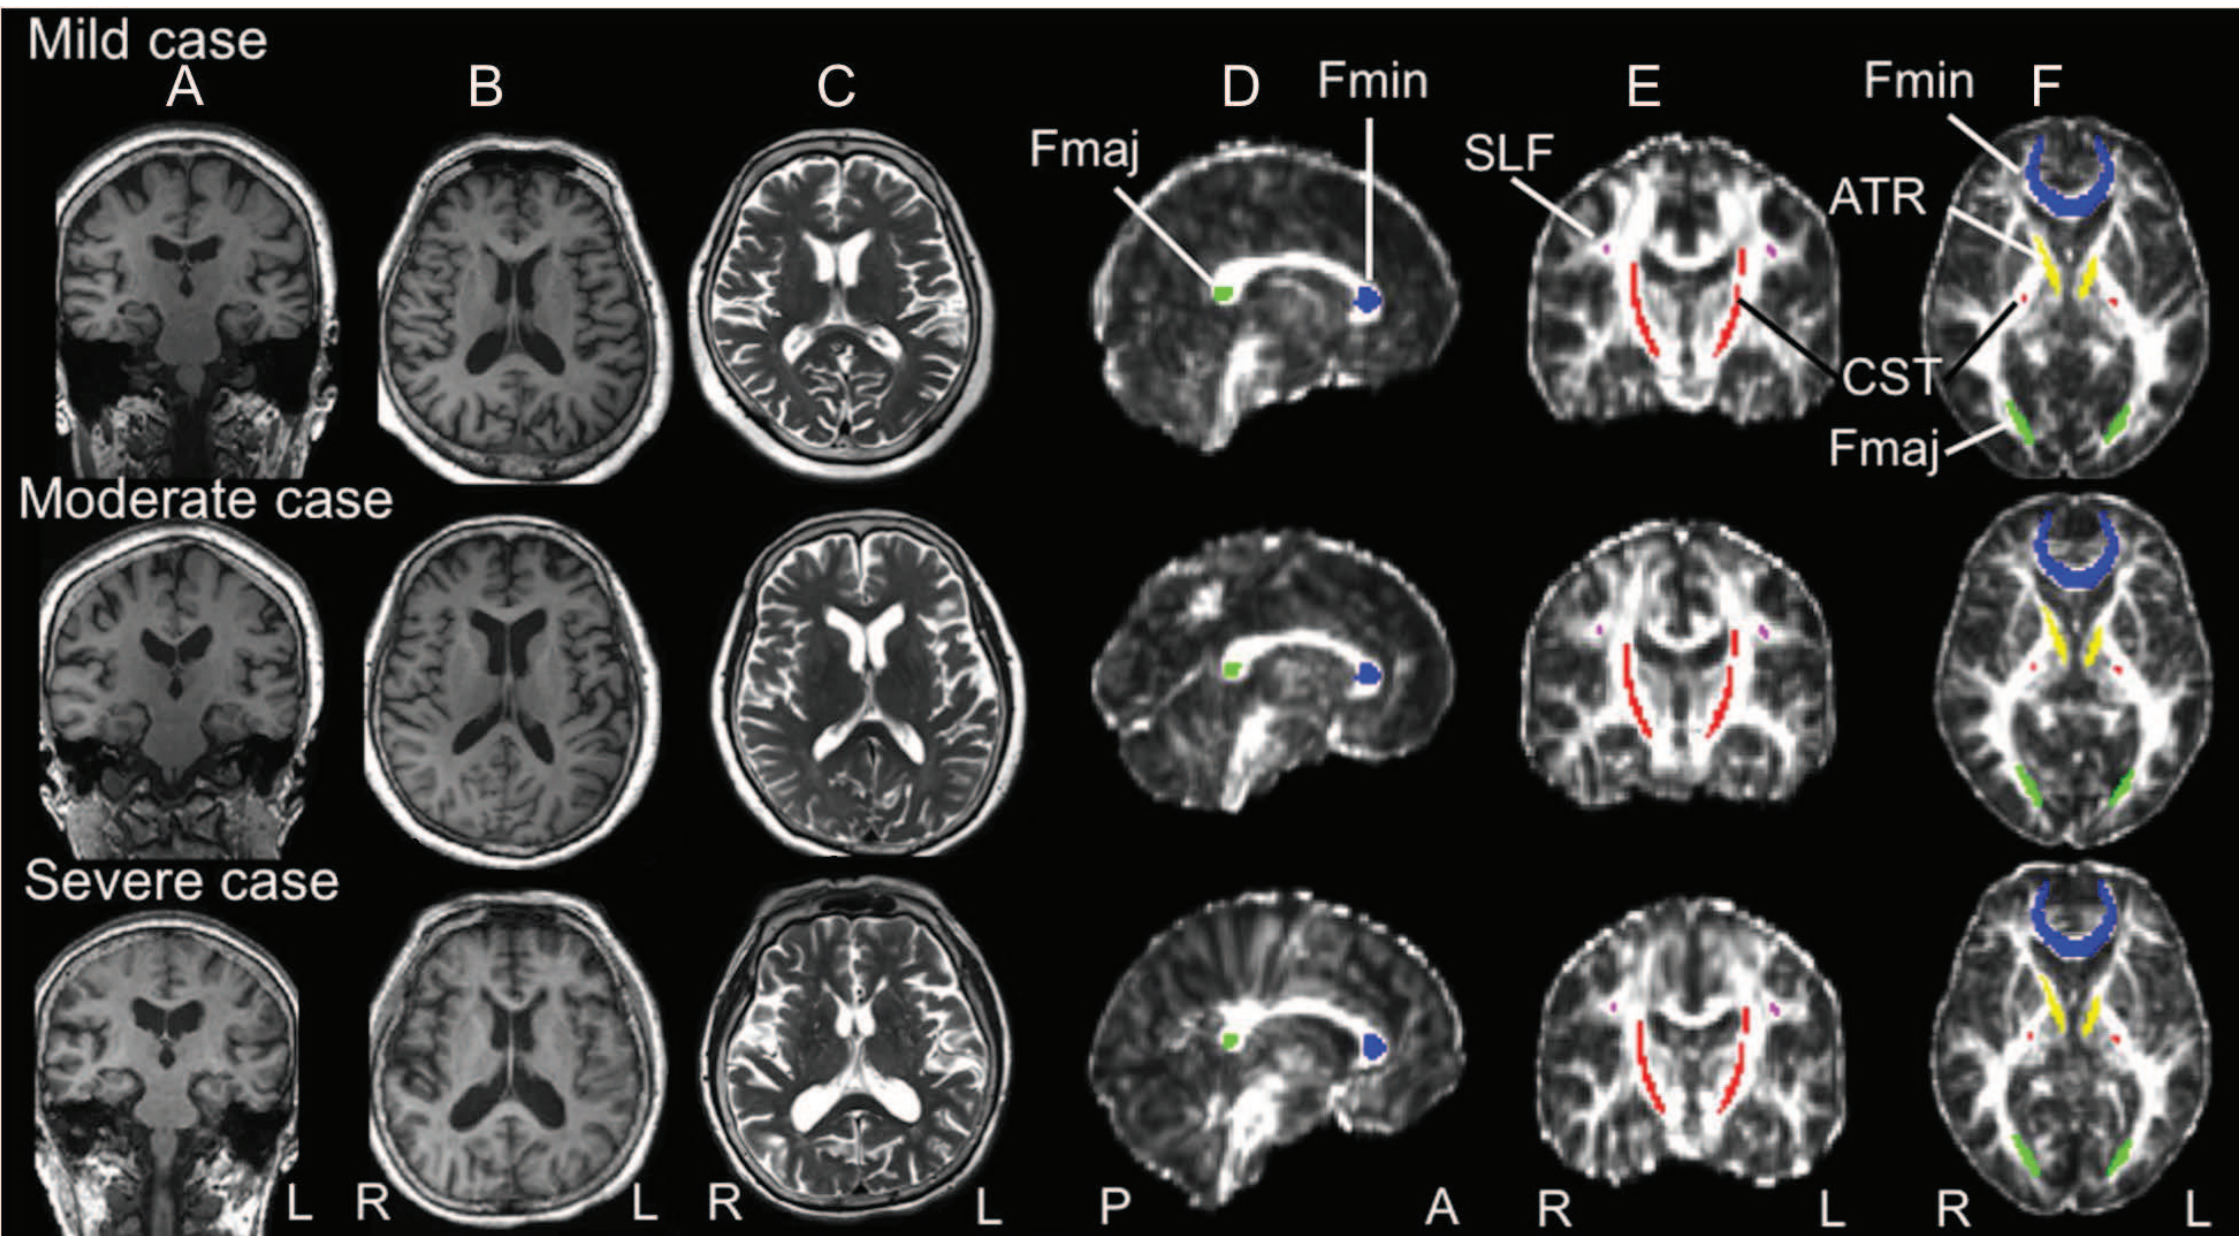

Supplement: MOESM2 [file 9680730]
